# Supplementary material for: Quantitative study of impact damage on yellow peaches based on reflectance, absorbance and Kubelka–Munk spectral data
Source: Royal Society of Chemistry journal article supplement (doi:10.1039/d2ra04635k), 2022-01-01
Supplement: d2ra04635k1.pdf [file d2ra04635k1.pdf]

Table S1 Prediction results of PLSR and SVR based on characteristic wavelengths

| Spectra | Model                | Mechanical parameter | Number               | Parameter      | Model set |                  | Prediction set |                  |       |       |
|---------|----------------------|----------------------|----------------------|----------------|-----------|------------------|----------------|------------------|-------|-------|
|         |                      |                      |                      |                | RMSEC     | R <sup>2</sup> C | RMSEP          | R <sup>2</sup> P | RPD   |       |
| R       | SNV-                 | DA(mm <sup>2</sup> ) | 60                   | 6              | 91.675    | 0.827            | 100.784        | 0.788            | 2.175 |       |
|         | UVE-                 | AE(J)                | 55                   | 11             | 1.308     | 0.704            | 1.404          | 0.658            | 1.577 |       |
|         | PLSR                 | MF(N)                | 51                   | 8              | 66.752    | 0.802            | 66.374         | 0.800            | 2.214 |       |
|         | Raw-                 | DA(mm <sup>2</sup> ) | 35                   | 8              | 68.233    | 0.904            | 87.849         | 0.841            | 2.540 |       |
|         | CARS                 | AE(J)                | 14                   | 8              | 1.316     | 0.694            | 1.362          | 0.693            | 1.435 |       |
|         | -PLSR                | MF(N)                | 28                   | 10             | 48.449    | 0.896            | 54.825         | 0.862            | 2.675 |       |
|         | Raw-                 | DA(mm <sup>2</sup> ) | 106                  | 7              | 86.824    | 0.844            | 92.415         | 0.824            | 2.504 |       |
|         | UVE-                 | AE(J)                | 75                   | 13             | 1.227     | 0.733            | 1.386          | 0.682            | 1.582 |       |
|         | PLSR                 | MF(N)                | 75                   | 12             | 57.698    | 0.853            | 59.025         | 0.840            | 2.462 |       |
|         | SNV-                 | DA(mm <sup>2</sup> ) | 21                   | (100,0.1,0.01) | 60.964    | 0.839            | 101.174        | 0.789            | 2.022 |       |
|         | CARS                 | AE(J)                | 9                    | (100,0.1,0.1)  | 1.292     | 0.728            | 1.323          | 0.699            | 1.422 |       |
|         | -SVR                 | MF(N)                | 28                   | (100,0.1,0.1)  | 38.236    | 0.937            | 61.489         | 0.838            | 2.185 |       |
|         | Raw-                 | DA(mm <sup>2</sup> ) | 35                   | (100,0.1,0.1)  | 61.840    | 0.923            | 97.121         | 0.816            | 2.238 |       |
|         | CARS                 | AE(J)                | 14                   | (100,0.1,0.1)  | 1.287     | 0.717            | 1.378          | 0.671            | 1.465 |       |
|         | -SVR                 | MF(N)                | 28                   | (100,0.1,0.1)  | 56.747    | 0.860            | 61.679         | 0.845            | 2.350 |       |
|         | Raw-                 | DA(mm <sup>2</sup> ) | 106                  | (100,0.1,0.01) | 84.342    | 0.854            | 97.959         | 0.814            | 2.198 |       |
|         | UVE-                 | AE(J)                | 75                   | (10,0.1,0.1)   | 0.726     | 1.275            | 0.603          | 1.561            | 1.067 |       |
|         | SVR                  | MF(N)                | 75                   | (10,0.1,0.1)   | 60.964    | 0.839            | 79.770         | 0.721            | 1.788 |       |
|         | A                    | Raw-                 | DA(mm <sup>2</sup> ) | 75             | 8         | 85.551           | 0.849          | 97.289           | 0.804 | 2.313 |
|         |                      | UVE-                 | AE(J)                | 96             | 14        | 1.228            | 0.733          | 1.347            | 0.701 | 1.652 |
| PLSR    |                      | MF(N)                | 73                   | 8              | 68.792    | 0.790            | 70.113         | 0.774            | 2.023 |       |
| Raw-    |                      | DA(mm <sup>2</sup> ) | 75                   | (100,0.1,0.01) | 96.787    | 0.807            | 105.552        | 0.777            | 1.996 |       |
| UVE-    |                      | AE(J)                | 96                   | (100,0.1,0.01) | 1.434     | 0.645            | 1.645          | 0.556            | 1.173 |       |
| SVR     |                      | MF(N)                | 73                   | (10,0.1,0.1)   | 67.263    | 0.803            | 75.777         | 0.744            | 1.840 |       |
| GF-     |                      | DA(mm <sup>2</sup> ) | 76                   | 7              | 98.912    | 0.801            | 98.190         | 0.793            | 2.227 |       |
| UVE-    |                      | AE(J)                | 82                   | 12             | 1.505     | 0.635            | 1.363          | 0.628            | 1.290 |       |
| PLSR    |                      | MF(N)                | 117                  | 13             | 67.843    | 0.795            | 70.405         | 0.776            | 1.973 |       |
| K-M     |                      | Raw-                 | DA(mm <sup>2</sup> ) | 33             | 7         | 82.444           | 0.862          | 87.984           | 0.835 | 2.362 |
|         | CARS                 | AE(J)                | 18                   | 10             | 1.381     | 0.692            | 1.087          | 0.762            | 1.705 |       |
|         | -PLSR                | MF(N)                | 38                   | 13             | 56.251    | 0.859            | 57.483         | 0.850            | 2.450 |       |
|         | Raw-                 | DA(mm <sup>2</sup> ) | 98                   | 11             | 80.500    | 0.868            | 88.463         | 0.833            | 2.486 |       |
|         | UVE-                 | AE(J)                | 68                   | 13             | 1.382     | 0.692            | 1.257          | 0.682            | 1.513 |       |
|         | PLSR                 | MF(N)                | 114                  | 14             | 63.665    | 0.819            | 65.240         | 0.807            | 2.099 |       |
| GF-     | DA(mm <sup>2</sup> ) | 36                   | (100,0.1,0.1)        | 86.872         | 0.849     | 112.473          | 0.737          | 1.665            |       |       |

|      |         |     |               |         |        |         |       |       |
|------|---------|-----|---------------|---------|--------|---------|-------|-------|
| CARS | AE(J)   | 38  | (100,0.1,0.1) | 1.114   | 0.810  | 1.400   | 0.772 | 1.142 |
| -SVR | MF(N)   | 35  | (10,0.1,0.1)  | 77.844  | 0.731  | 87.281  | 0.677 | 1.324 |
| GF-  | DA(mm2) | 76  | (10,0.1,0.1)  | 103.159 | 0.786  | 113.718 | 0.734 | 1.608 |
| UVE- | AE(J)   | 82  | (10,0.1,0.1)  | 1.470   | 0.684  | 1.278   | 0.679 | 1.200 |
| SVR  | MF(N)   | 117 | (100,0.1,0.1) | 59.819  | 0.842  | 82.650  | 0.695 | 1.591 |
| Raw- | DA(mm2) | 33  | (100,0.1,0.1) | 80.482  | 0.871  | 109.144 | 0.760 | 1.863 |
| CARS | AE(J)   | 18  | (100,0.1,0.1) | 1.470   | 0.684  | 1.278   | 0.679 | 1.200 |
| -SVR | MF(N)   | 38  | (100,0.1,0.1) | 0.842   | 59.819 | 82.650  | 0.695 | 1.591 |

Spectra: Three kinds of spectra of R, A, and K-M; Number: Number of characteristic wavelengths;
